# Supplementary material for: Identification and interest of molecular markers to monitor plant Pi status
Source: PubMed Central journal article supplement (PMC10463364; doi:10.1186/s12870-023-04411-8), 2023-08-23
Supplement: 12870_2023_4411_MOESM1_ESM.pdf [file 12870_2023_4411_MOESM1_ESM.pdf]

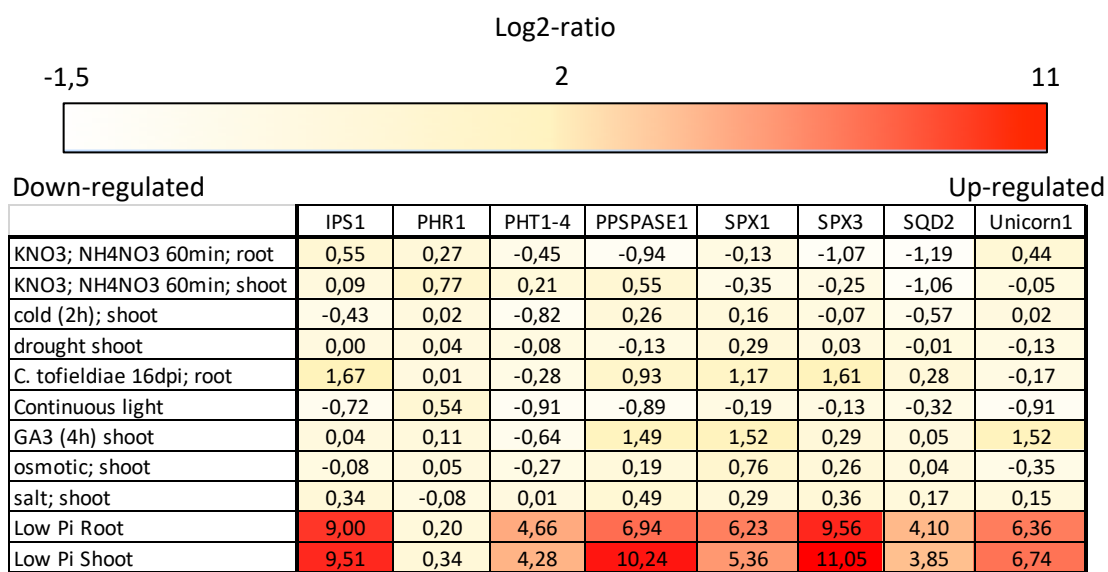

**Fig. S1: Gene specificity HeatMap.** Values obtained from Genevestigator, AT\_mRNASeq\_ARABI\_GL-9 database and RNAseq datas. We only utilised values for wild type (Col-0).

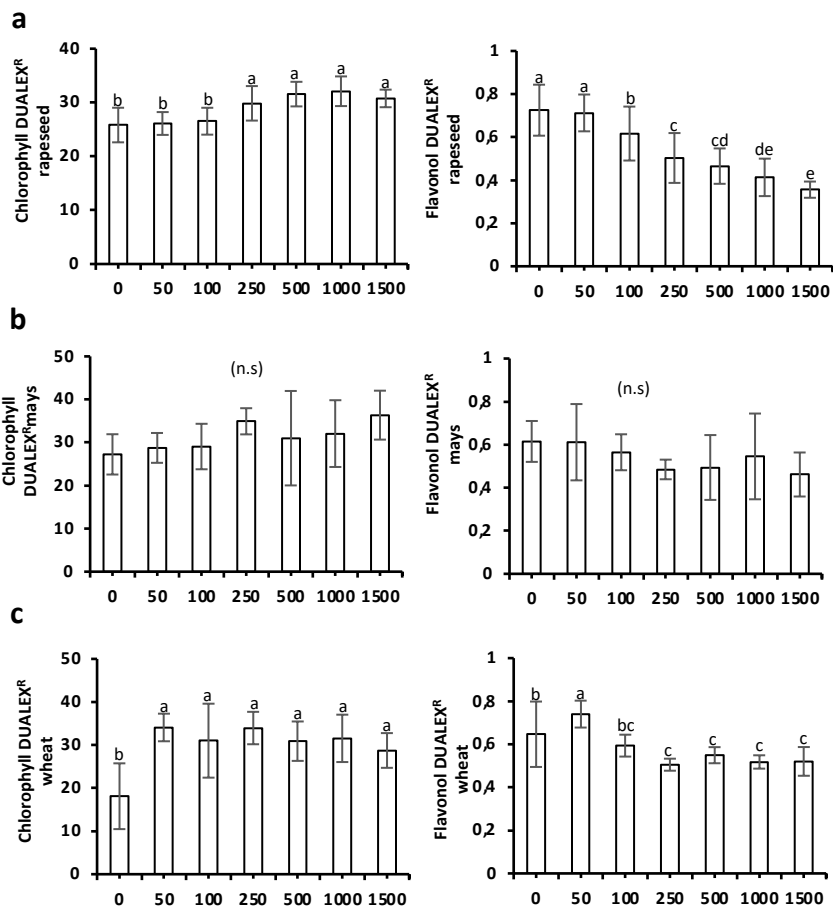

**Fig. S2: Chlorophyll and Flavonol measurements of 29-old-day plants exposed to different doses of Pi.** Dualex<sup>R</sup> spectral measurements (Chlorophyll and Flavonol Index) of second youngest leaf the day before harvest. (a) Rapeseed. (b) Mays. (c) Wheat. Bars indicate means  $\pm$  SD. Different letters indicate significant different means (one-way ANOVA followed by SNK test, n=7).

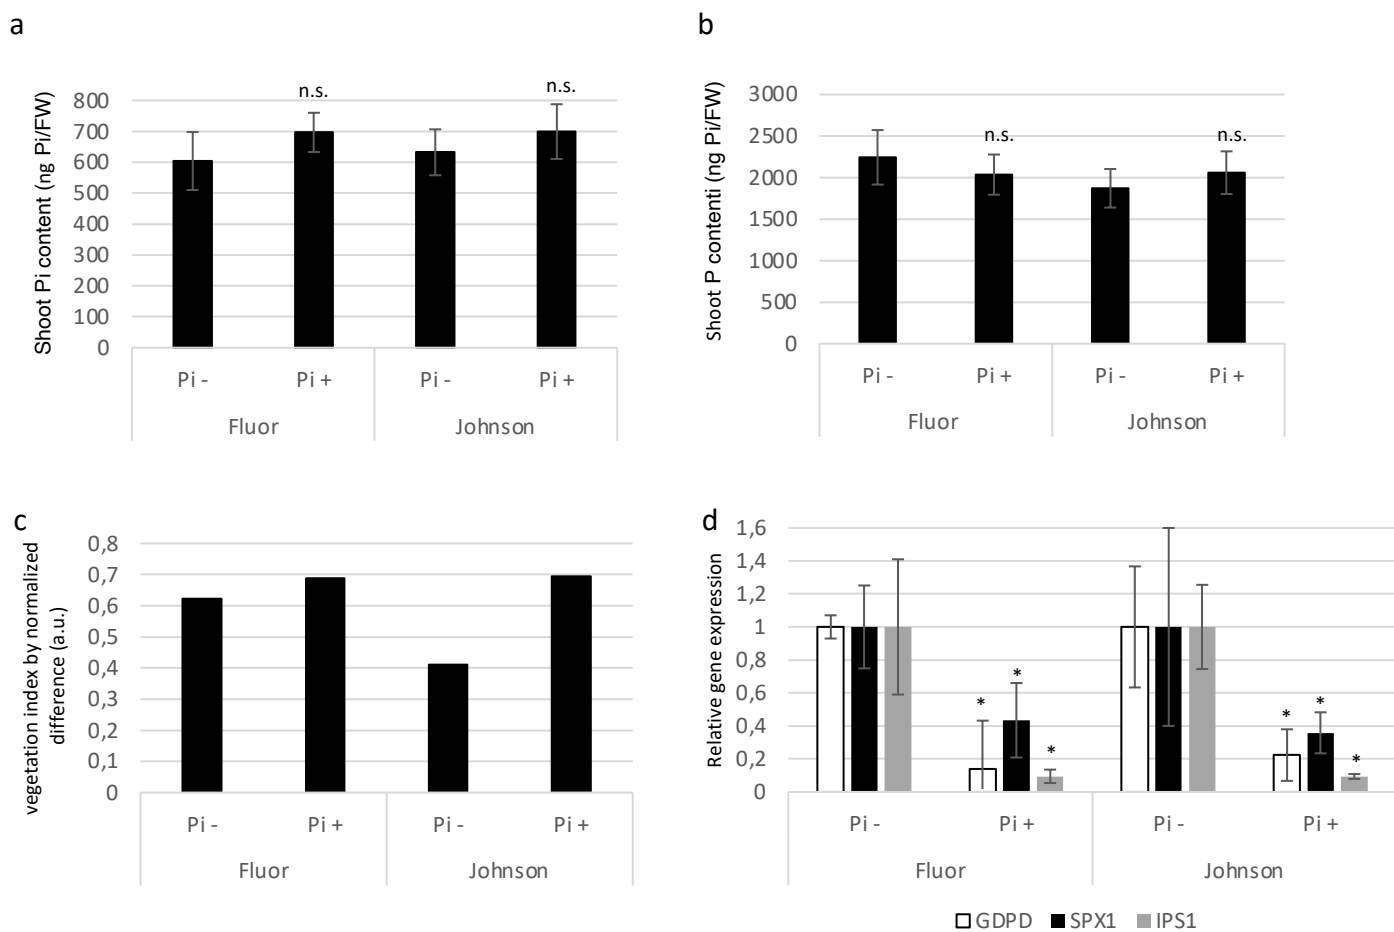

**Fig. S3: Analysis of two *Triticum aestivum* varieties grown in Pi depleted (Pi-) or Pi fertilized (Pi+) fields after 6 months**

(a) Measure of total P content in shoots. (b) Measure of free Pi content in shoots; (c) Measure of normalized difference vegetation index; (d) Relative gene expression analyses of selected molecular markers. TaACT was used as housekeeping gene.

Significant (\*) or non significant (n.s.) different means by one way ANOVA at  $p < 0,05$ ,  $n = 5$ . For each sample two young leaves were harvested.

|    | (ng/mg DW) |
|----|------------|
| P  | 9.2        |
| Fe | 6.4        |
| Al | 13.2       |
| B  | 0.8        |
| Ca | 8.8        |
| Cu | 0.0        |
| K  | 31.8       |
| Mg | 6.3        |
| Mn | 0.1        |
| Mo | 2.0        |
| Na | 2809.1     |
| S  | 3212.0     |
| Zn | 0.2        |

Table S1: elements present in the Sima Aldrich agar used for this study

|                                                                               | Soil 1<br>Cazevieille) | Soil 2<br>(CMI) | Soil 3<br>(LUFA) | Soil<br>(Giroussens) |
|-------------------------------------------------------------------------------|------------------------|-----------------|------------------|----------------------|
| <i>Granulometry</i>                                                           |                        |                 |                  |                      |
| Clay (<2 µm) (g/kg)                                                           | 476                    | 189             | 86               | 111                  |
| Fine silt (2/20 µm) (g/kg)                                                    | 253                    | 365             | 137              | 172                  |
| Coarse silt (20/50 µm) (g/kg)                                                 | 121                    | 401             | 165              | 267                  |
| Fine sand (50/200 µm) (g/kg)                                                  | 67                     | 31              | 268              | 201                  |
| Coarse sand (200/2000 µm) (g/kg)                                              | 18                     | 14              | 344              | 235                  |
| <i>Chemical characteristics</i>                                               |                        |                 |                  |                      |
| pH in water                                                                   | 7.75                   | 6.23            | 6.15             | 6,10                 |
| Total C (g/kg)                                                                | 36.2                   | 9.15            | 7.02             | 8,05                 |
| Organic C (g/kg)                                                              | 25.20                  | 8.98            | 6.97             | 7,5                  |
| SOM (g/kg)                                                                    | 43.60                  | 15.50           | 12.20            | 13                   |
| Cation exchange capacity - cobaltihexamine'<br>method (cmol <sub>c</sub> /kg) |                        |                 |                  |                      |
|                                                                               | 27.27                  | 9.25            | 4.38             | 5                    |
| Ca – cobaltihexamine' method (cmol <sub>c</sub> /kg)                          | 26.2                   | 7.84            | 3.46             | 3,66                 |
| Fe – cobaltihexamine' method (cmol <sub>c</sub> /kg)                          | 0.0092                 | 0.0101          | 0.0096           | ND                   |
| Total N Kjeldahl's method (g/kg)                                              | 2.50                   | 0.95            | 0.65             | 0,7                  |
| Total Ca HF (g/kg)                                                            | 33.4                   | 4.95            | 2.59             | ND                   |
| Total Fe HF (g/kg)                                                            | 42,3                   | 27,2            | 9,36             | ND                   |
| Total P HF (g/kg)                                                             | 0.67                   | 0.65            | 0.68             | ND                   |

**Table S2. Main characteristics of soils used in the study**

| Plant species | Name       | Accession number            | Forward primer (5'-3')      | Reverse primer (5'-3')   |
|---------------|------------|-----------------------------|-----------------------------|--------------------------|
| A. thaliana   | AtSPX1     | At5g20150                   | CGGGTTTTGAAGGAGATCAG        | GCGGCAATGAAAACACACTA     |
|               | AtSPX3     | At2g45130                   | ATGGCGAAATGGTTCTGCTA        | CCTCCTTTGTTGCGTTGTC      |
|               | AtUNICORN1 | At5g20790                   | CGTCTCGAACCAGAAATCAAT       | TATTAACGGCTCCGTTTTTCG    |
|               | AtIPS1     | At3g09922                   | TGAAGACTGCAGAAGGCTGA        | CGAAGCTTGCCAAAGGATAG     |
|               | AtSQD2     | At5g01220                   | TACCTGAAGCTCGGATTGCT        | TGTGAGAGTTCATCGCCTTG     |
|               | AtPHT1;4   | At2g38940                   | CCTCGGTCGTATTTATTACCACG     | CCATCACAGCTTTGGCTCATG    |
|               | AtPHR1     | At4g28610                   | GTTCAGCAGCAACCTTCTCC        | GCTCTTCTACTACCGCCAAG     |
| AtTUBULIN     | At5g62690  | GAGCCTTACAACGCTACTCTGTCTGTC | ACACCAGACATAGTAGCAGAAATCAAG |                          |
| B. napus      | BnSPX1     | XM_013819206.2              | CCAAGCAGAGCTCTCAGAG         | GAATCTTCTCCATGTCTCA      |
|               | BnIPS1.2   | JN542388.1                  | CGGGTTTTGTGTTCTGGAAG        | GGAACCGAAGCTTGCCAAA      |
|               | BnUNICORN1 | XM_013866441                | GGACGTTAGCTACGGAGGTG        | CCGTTTGTATCCATAACC       |
|               | BnPHT1;4   | KJ192193.1                  | GCCATCATAATCGTGGAAT         | GCCTGGGACGTGGTAGTAAA     |
|               | BnPHR1     | XM_013856598                | AGTCTCTGCAAACCATCCCA        | TGACAGCCTCAACAAAAGCC     |
|               | BnACT7     | NM_001316079                | TGAGAGATTCCGTTGCCCT         | CACCACTGAGGACGATGTTTC    |
|               | BnEf1alpha | NM_001315606                | AGTCTTTGTGGAGGCATT          | CTGGGTCATCCTGGGGTT       |
| Z. mays       | ZmSPX1     | XM_008678441                | CAAGTTCAACGCCTTCTCC         | GAAGTCGACGATCTCCTTGC     |
|               | ZmSPX3     | XM_008666764                | CACAGGGAGCTGAAGGAGAC        | GCCAGCCTGTGTAGTTGAT      |
|               | ZmSQD2     | BT087620                    | ATTGGAGACGGACCATTGAG        | CCACAACCCAGTGTCTCT       |
|               | ZmPHT2     | NM_001112346                | CATTGTCACGCTCGTCATCT        | GGTGGAGTTGAAGTGGTCTG     |
|               | ZmPHR1     | NM_001294298                | CCCTGCTGGGAATAATTTGA        | AACCGTTGAGTTTCTGTGG      |
|               | ZmEIF4A    | AF007580                    | GACAAGATGAGGAGCAGGGA        | CAATACCACGAGCAAGCAGG     |
|               | ZmTUBULIN  | GRMZM2G152466_T01           | CACTGATGTTGCTGCTCTGCT       | GTTGAGGTTGGGTAGGTTGGG    |
| T. aestivum   | TaSPX1     | AK332300                    | GACGCTGTGACACACGATAC        | GAAACAGGTGAGGCTCTGGT     |
|               | TaIPS1     | AK330946                    | CGGCGACTTCTACCTCTAC         | GACTACTGAAGACTCGCACCA    |
|               | TaGDPD     | AK447128                    | AATCAATGCCCTCGCTAC          | GTGTGATCTCCTCGGTGAG      |
|               | TaPHT1;2   | KJ170128                    | CATCCTCATGGTCTCTGCT         | GTGGCGCTCAGAGGATAGTC     |
|               | TaPT4      | AK333026                    | GGGCTTCATGTTACCTTCTCTG      | GGATCTTTGACCCACTCAACATCC |
|               | TaPHR1     | KC286911.1                  | TTCCAGGTTCCGGCTGATG         | CTGCCACCATTCAATTTGTT     |
|               | TaACTIN    | GQ339780                    | GTGTTGGATTCTGGTGATGGTG      | CGAGGTCAAGACGAAGGATGG    |
| TaGAPDH       | EF92180    | CCTTCATCACCACCGACTACA       | ACAGCAACCTCCTTCTACC         |                          |

Table S3: List of primers used for this study
